# Supplementary material
Source: publisher figshare collection journal article supplement (https://karger.figshare.com/articles/dataset/_/5418601)
Supplement: Supplementary file 1 [file 1]

Archive with 2 entries (2 files):
- CMR471851_sm_Suppl._Material_2.pdf
- CMR471851_sm_Suppl._Material_1.pdf
