# Supplementary material
Source: publisher figshare collection journal article supplement (https://karger.figshare.com/articles/dataset/_/5418601)
Supplement: Supplementary file 1 [file 1 › CMR471851_sm_Suppl._Material_1.pdf]

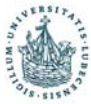

## Job-profile of non-medical practitioners in Schleswig-Holsteins

Dear non-medical practitioner,

thanks a lot for your participation. Just to ensure: This survey remains anonymous. With completing and resending this questionnaire you declare to be content with the scientific evaluation of your answers at the institution of general practice at the university hospital of Schleswig-Holstein, Campus Luebeck. Your statements will obviously be treated strictly confidential. There will no information be given to a third party.

Please take note of the following advices:

- Please just use black or blue biro.
  - For free-text please use block-capitals.
  - Please mark the boxes with a clearly visible cross: ☐
  - If you accidentally set the cross wrong please fill in the whole box: ☐
- and mark the cross again: ☐

### Profile of the practice and demographic data

---

1. How old are you?      \_\_ \_\_ years
2. Are you...  
☐ female                      ☐ male
3. How many years are you practicing as a non-medical practitioner?  
☐ < 5    ☐ 5-10    ☐ 11-20    ☐ > 20 years
4. Where is your practice situated?    ☐ urban            ☐ rural
5. Did you learn another profession before qualifying as a non-medical practitioner?  
☐ Yes, namely: \_\_\_\_\_  
☐ no

Please estimate the following data:

- a. How many patients are you treating in a typical week?      \_\_ \_\_ patients
- b. How many minutes on average are taken for a patient contact?      \_\_ \_\_ minutes

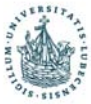

**6. Please name the five most common reasons for encounter of your patients :**

*Please annotate.*

1.

2.

3.

4.

5.

**7. Please name the five most common treatment methods you are using:**

*Please annotate.*

1.

2.

3.

4.

5.

**8. Did you miss specific aspects in our survey? If yes, please name.**

---

---

---

---

**Thank you for participation!**
