# Supplementary material
Source: publisher figshare collection journal article supplement (https://karger.figshare.com/articles/dataset/_/5418601)
Supplement: Supplementary file 1 [file 1 › CMR471851_sm_Suppl._Material_2.pdf]

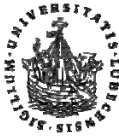

UNIVERSITÄT ZU LOBECK

### Information in case of non-participation in the survey

Please only fill out this paper if you don't want to fill in the questionnaire.

You will help us, giving some details about your non-participation:

|                                                                |                                                                                                                                                                                                                                               |
|----------------------------------------------------------------|-----------------------------------------------------------------------------------------------------------------------------------------------------------------------------------------------------------------------------------------------|
| Gender:                                                        | <input type="checkbox"/> Female <input type="checkbox"/> Male                                                                                                                                                                                 |
| Age:                                                           | _____                                                                                                                                                                                                                                         |
| Mode of practice                                               | <input type="checkbox"/> single practice<br><input type="checkbox"/> practice including more than one non- medical-<br>practitioner                                                                                                           |
| Reasons for non-<br>responding:<br>(multiple answers possible) | <input type="checkbox"/> I'm not interested in this topic<br><input type="checkbox"/> I haven't time<br><input type="checkbox"/> I'm not taking part in surveys principally<br><input type="checkbox"/> other matters, namely: _____<br>_____ |

**Thank you!**
